# Supplementary material for: An Optimization Tool to Formulate Diets within a Supplementary Nutrition Program for Children
Source: PubMed Central journal article supplement (PMC11305195; doi:10.1016/j.cdnut.2024.104409), 2024-06-29
Supplement: mmc1.pdf [file mmc1.pdf]

**An Optimisation Tool to Formulate Diets within a Supplementary Nutrition Program for Children:  
Fathima Ayoob, Jawahar R Manivannan**

**Supplementary Tables and Figures**

**Supplementary Table 1.** Fortified Foods per 100 grams in ICDS and their fortification level.

| <b>Nutrients</b>              | <b>Rice</b> | <b>Whole Wheat<br/>Flour</b> | <b>Milk</b> | <b>Salt</b> |
|-------------------------------|-------------|------------------------------|-------------|-------------|
| Iron (mg)                     | 4.25        | 4.25                         |             | 85.0        |
| Folic Acid (mcg)              | 12.5        | 12.5                         |             |             |
| Vitamin B <sub>12</sub> (mcg) | 0.125       | 0.125                        |             |             |
| Vitamin A (mcg)               |             |                              | 75.0        |             |
| Iodine (ppm)                  |             |                              |             | 15.0        |

**Supplementary Table 2.** Optimised six-day menu for Hot Cooked Meal with market survey prices for a child 3-6y in Karnataka.

| <b>Day</b> | <b>Type of Meal</b> | <b>Recipe Name</b>             | <b>Minimum Serving Size</b> | <b>Unit</b> | <b>Cost per Beneficiary (Rs.)</b> | <b>Subsidised Cost per Beneficiary (Rs.)</b> |
|------------|---------------------|--------------------------------|-----------------------------|-------------|-----------------------------------|----------------------------------------------|
| 1          | Main meal           | Steamed rice                   | 1.28                        | Bowl        | 0.17                              | 0.17                                         |
|            |                     | Egg                            | 1.0                         | No.         | 5                                 | 2.5                                          |
|            |                     | Amaranthus horse-gram dal      | 0.64                        | Bowl        | 3.13                              | 3.13                                         |
|            | Snack               | Groundnut bar                  | 10.0                        | gm          | 1.2                               | 1.2                                          |
| 2          | Main meal           | Steamed rice                   | 1.32                        | Bowl        | 0.17                              | 0.17                                         |
|            |                     | Egg                            | 1.0                         | No.         | 5                                 | 2.5                                          |
|            |                     | Green gram dal curry           | 0.66                        | Bowl        | 3.13                              | 3.13                                         |
|            | Snack               | Roasted groundnut              | 10.0                        | gm          | 1.2                               | 1.2                                          |
| 3          | Main meal           | Steamed rice                   | 1.31                        | Bowl        | 0.17                              | 0.17                                         |
|            |                     | Egg                            | 1.0                         | No.         | 5                                 | 2.5                                          |
|            |                     | Horse-gram dal sambar          | 0.65                        | Bowl        | 3.14                              | 3.14                                         |
|            | Snack               | Roasted groundnut              | 10.0                        | gm          | 1.2                               | 1.2                                          |
| 4          | Main meal           | Steamed rice                   | 1.34                        | Bowl        | 0.17                              | 0.17                                         |
|            |                     | Egg                            | 1.0                         | No.         | 5                                 | 2.5                                          |
|            |                     | Sprouted horse-gram dal sambar | 0.67                        | Bowl        | 3.18                              | 3.3                                          |
|            | Snack               | Roasted groundnut              | 10.0                        | gm          | 1.2                               | 1.2                                          |

|                              |           |                   |      |      |      |      |
|------------------------------|-----------|-------------------|------|------|------|------|
| 5                            | Main meal | Egg               | 1.0  | No.  | 5    | 2.5  |
|                              |           | Vegetable pulao   | 0.8  | Bowl | 2.95 | 2.95 |
|                              | Snacks    | Wheat rava        | 0.5  | Bowl | 1.85 | 1.85 |
|                              |           | payasam           |      |      |      |      |
| 6                            | Main meal | Steamed rice      | 1.3  | Bowl | 0.17 | 0.17 |
|                              |           | Egg               | 1.0  | No.  | 5    | 2.5  |
|                              |           | Horse gram dal    | 0.65 | Bowl | 3.47 | 3.63 |
|                              |           | fenugreek leaves  |      |      |      |      |
|                              |           | sambar            |      |      |      |      |
|                              | Snacks    | Roasted groundnut | 10.0 | gm   | 1.2  | 1.2  |
| Total cost per week (6 days) |           |                   |      |      | 57.7 | 43.0 |
| Total cost per day           |           |                   |      |      | 9.6  | 7.16 |

---

**Supplementary Table 3.** Cost of an example optimized Take Home Ration solution for children 1-3y from Karnataka state of India.

|                        | <b>Cost</b> | <b>Subsidised Cost</b> |
|------------------------|-------------|------------------------|
| Per day (₹, average)   | 7.8         | 6.7                    |
| Per week (₹, 6 days)   | 46.8        | 40.1                   |
| Per month (₹, 25 days) | 194.9       | 167.2                  |
| Per year (₹, 300 days) | 2339.3      | 2006.3                 |

**Supplementary Table 4.** Ingredient composition of the optimized THR solution with market and subsidised prices.

|                                         | <b>Wheat<br/>Flour</b> | <b>Whole<br/>Green<br/>Gram</b> | <b>Whole<br/>Milk<br/>Powder</b> | <b>Fortified<br/>Oil</b> | <b>Sugar</b> | <b>Total</b> |
|-----------------------------------------|------------------------|---------------------------------|----------------------------------|--------------------------|--------------|--------------|
| Quantity/beneficiary/day<br>(g)         | 54                     | 25                              | 10                               | 10                       | 5            | 104          |
| Cost/beneficiary/day (₹)*               | 0.11                   | 2.04                            | 3.7                              | 1.75                     | 0.2          | 7.8          |
| Subsidised<br>cost/beneficiary/day (₹)* | 0.11                   | 2.04                            | 2.59                             | 1.75                     | 0.2          | 6.69         |
| Cost/kg (₹)*                            | 2                      | 84                              | 370                              | 180                      | 40           |              |
| Subsidised cost/kg (₹)*                 | 2                      | 84                              | 259                              | 180                      | 40           |              |

\* 82 Indian rupee (₹) equivalent to 1 USD

**Supplementary Figure 1. Sampling strategy for data collection**

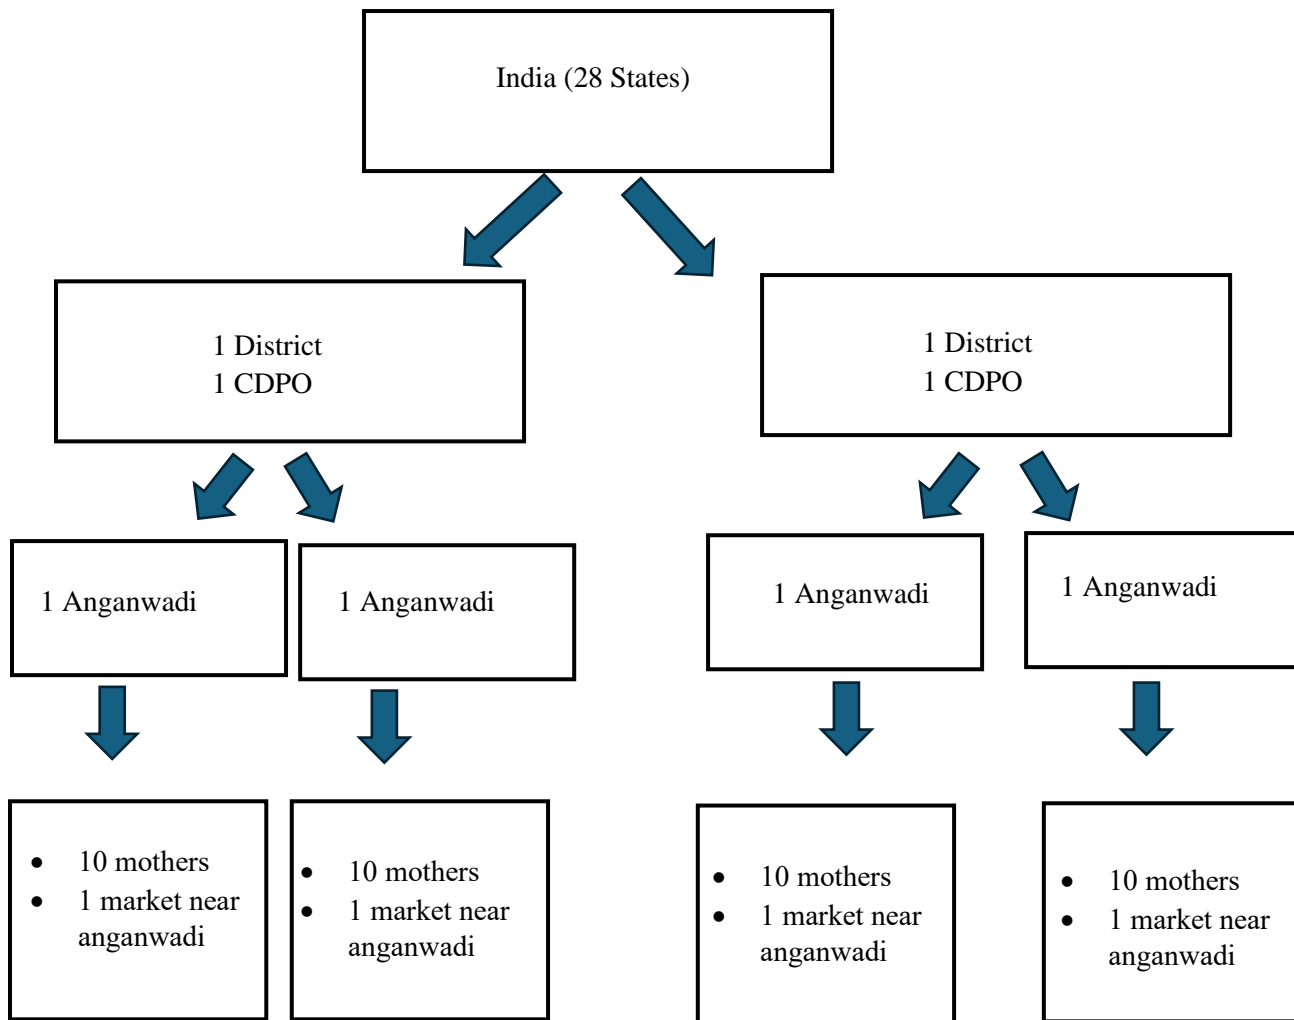

**Supplementary Figure 2:** Line chart illustrating the weekly analysis of nutrient provision, highlighting fluctuations in macronutrient composition in each day, along with the corresponding fat:energy and protein:energy ratios for an optimized solution for Hot Cooked meal in Karnataka state.

Weekly Nutrient Analysis

| DAY | ENERGY   | PROTEIN | FAT    | PE RATIO | FE RATIO |
|-----|----------|---------|--------|----------|----------|
| 1   | 400 Kcal | 18.0 g  | 13.6 g | 18.0     | 31.0     |
| 2   | 400 Kcal | 17.7 g  | 14.0 g | 18.0     | 31.0     |
| 3   | 400 Kcal | 16.8 g  | 14.2 g | 17.0     | 32.0     |
| 4   | 400 Kcal | 17.3 g  | 13.8 g | 17.0     | 31.0     |
| 5   | 400 Kcal | 17.8 g  | 14.0 g | 18.0     | 31.0     |
| 6   | 401 Kcal | 14.2 g  | 14.4 g | 14.0     | 32.0     |

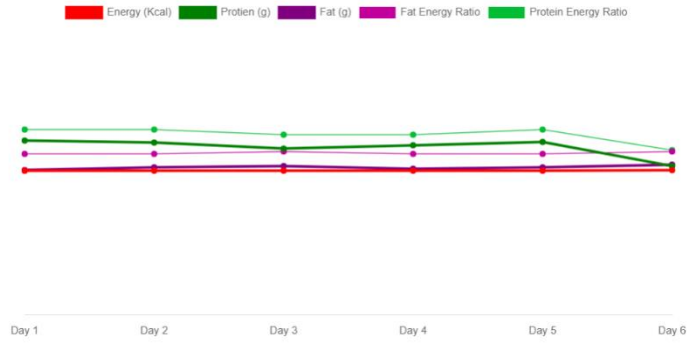

**Supplementary Figure 3:** Stacked bar diagrams of the percent contribution of each food group to macro and micro-nutrient content in the example of optimized Hot Cooked Meal for 3-6y children in Karnataka. Each bar represents the 100% of the nutrient in the optimized HCM and each colour within that bar is a % contribution of a food group to that nutrient.

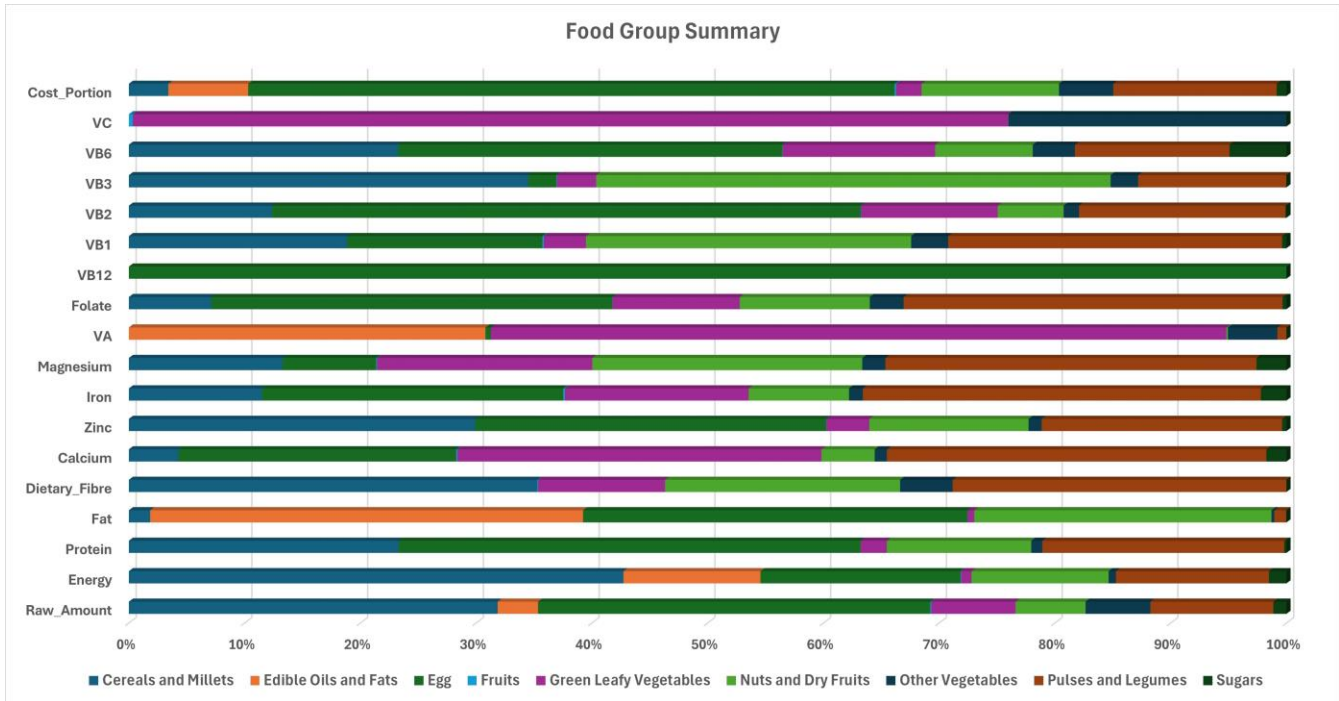



**Supplementary Figure 4:** Stacked bar diagram of the percent contribution of each food to macro and micro-nutrient content in the example of optimized Hot Cooked Meal for 3-6y children.

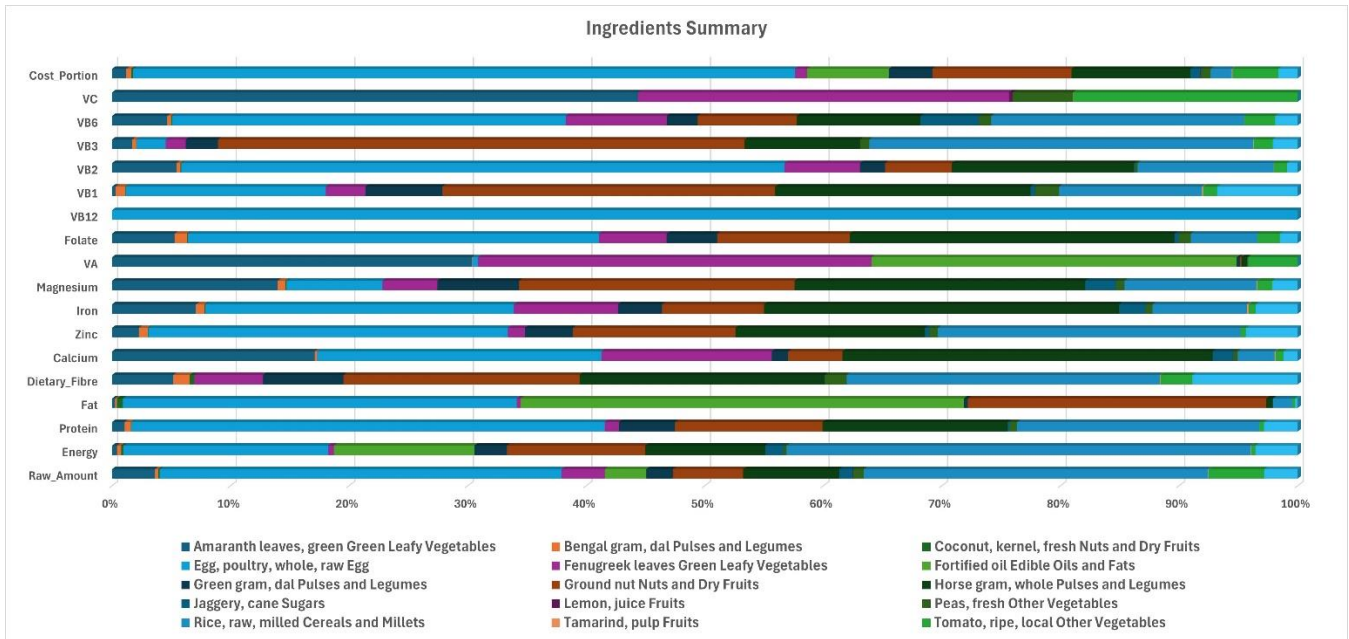

## LPP of HCM

### Objective function

$$\min \sum_{i=1}^I S_i C_i \quad (1)$$

### Subject to

#### Constraint for EAR and TUL of nutrients

$$EAR(N_j) \leq \sum_{i=1}^I S_i N_{ij} \leq TUL(N_j) \quad , \forall i \in Recipe, \forall j \in Nutrients$$

#### Constraints for Normal children

$$\sum_{j=1}^J S_j D_j \leq 1.5, \forall j \in Main\ dish\ recipes$$

$$\sum_{j=1}^J D_j = 1, \forall j \in Main\ dish\ recipes$$

$$\sum_{i=1}^I S_i D_i \leq 1, \forall i \in Snack\ recipes$$

$$\sum_{i=1}^I D_i = 1, \forall i \in Snack\ recipes$$

#### Constraints for SAM children

$$\sum_{j=1}^J S_j D_j \leq 1.5, \forall j \in Main\ dish\ recipes$$

$$\sum_{j=1}^J D_j = 1, \forall j \in Main\ dish\ recipes$$

$$\sum_{i=1}^I S_i D_i \leq 2, \forall i \in Snack\ recipes$$

$$\sum_{i=1}^I D_i = 1, \forall i \in Snack\ recipes$$

#### Constraints for proportions in combinations, where R<sub>1</sub> (main dish), R<sub>2</sub> (curry) and R<sub>3</sub> (side dish)

$$0.5 S_i D_i \leq S_k D_k \leq 0.8 S_i D_i, \forall i \in R_1, \forall k \in R_2$$

$$0.25 S_i D_i \leq S_m D_m \leq 0.75 S_i D_i, \forall i \in R_1, \forall m \in R_3$$

#### Constraint for compulsory foods

$$0.5 \leq S_i D_i \leq 1.5, \forall i \text{ in Compulsory foods}$$

where  $D_i = 1, \forall i \text{ in Compulsory foods}$

#### Constraint for additional foods

$$S_i D_i \leq 1.5, \forall i \text{ in Additional foods}$$

where  $D_i \in \{0,1\}, \forall i \text{ in Additional foods}$

$$S_i, C_i, N_{ij}, N_j, S_k, S_m \in \mathbb{R}^+$$

where  $S$  is the serving size of the corresponding recipe type,  $C_i$  is the cost of the  $i^{\text{th}}$  recipe and  $N_{ij}$  is the  $j^{\text{th}}$  nutrient value of the  $i^{\text{th}}$  recipe and  $N_j$  is the  $j^{\text{th}}$  nutrient value.

$$D_i, D_j, D_k, D_m \in \{0,1\}$$

where  $D$  are the decision variables for the corresponding recipe type, i.e whether the recipe shall be included in the model or not.

## LPP of THR

### Objective function

$$\min \sum_{i=1}^I Q_i C_i \quad (2)$$

### subject to

$$EAR(N_j) \leq \sum_{i=1}^I Q_i N_{ij} \leq TUL(N_j) \quad , \forall i \in \text{Food Items}, \forall j \in (\text{Energy, Protein and Fat})$$

**Constraint on the inclusion of at least one food item from each food group for whole foods and blended premix**

$$N_{k\_min} \leq \sum_{i=1}^I D_{ik} \leq N_{k\_max} \quad , \forall i \in \text{Items in } k^{\text{th}} \text{ food group}$$

**Constraints on the minimum and maximum quantities within each food group for whole foods and blended premix**

$$Q_{k\_min} \leq \sum_{i=1}^I Q_{ik} \leq Q_{k\_max} \quad , \forall i \in \text{Items in } k^{\text{th}} \text{ food group}$$

**Constraints subjected to quantity restrictions at the food item level for whole foods and blended premix**

$$D_i Q_{i\_min} \leq Q_i \leq D_i Q_{i\_max} \quad , \forall i \in \{\text{oils, eggs, ground nut, sugar, jaggery, whole milk powder, black \& white sesame seeds}\}$$

**Constraint for maintaining a cereal:pulse ratio of 2:1**

$$1.8 \sum_{m=1}^M Q_m \leq \sum_{n=1}^N Q_n \leq 2.2 \sum_{m=1}^M Q_m \quad , \forall m \in \text{Pulses and } \forall n \in \text{Cereals}$$

**Constraint for compulsory inclusion of cereal or millet**

$$Q_{k\_min} \leq \sum_{i=1}^I Q_{ik} \leq Q_{k\_max} \quad , \forall i \in \text{Items in cereals or millets}$$

$$Q_i, C_i, N_j, N_{ij}, Q_{k\_min}, Q_{k\_max}, Q_{ik}, Q_{i\_min}, Q_{i\_max}, Q_m, Q_n \in \mathbb{R}^+$$

where  $Q_i$  is the quantity of the  $i^{\text{th}}$  food item,  $C_i$  is the cost of the  $i^{\text{th}}$  food item,  $N_j$  is the  $j^{\text{th}}$  nutrient value,  $N_{ij}$  is the  $j^{\text{th}}$  nutrient value of the  $i^{\text{th}}$  food item,  $Q_{k\_min}$  is the minimum quantity of  $k^{\text{th}}$  food group,  $Q_{k\_max}$  is the maximum quantity of the  $k^{\text{th}}$  food group,  $Q_{ik}$  is the quantity of  $i^{\text{th}}$  food item belonging to  $k^{\text{th}}$  food group,  $Q_{i\_min}$  is the minimum quantity of  $i^{\text{th}}$  food item,  $Q_{i\_max}$  is the maximum quantity of the  $i^{\text{th}}$  food item,  $Q_m$  is the quantity of pulses,  $Q_n$  is the quantity of cereals

$$D_i \in \{0, 1\}$$

where  $D_i$  is the decision variable for the  $i^{\text{th}}$  food item, i.e whether the food item shall be included in the model or not.

$$N_{k\_min}, N_{k\_max} \in \mathbb{Q}^+$$

$N_{k\_min}$  is the minimum number of food items to be chosen from  $k^{\text{th}}$  food group,  $N_{k\_max}$  is the maximum number of food items to be chosen from  $k^{\text{th}}$  food group.
